# Supplementary material for: Synthesis and characterization of novel electrochromic poly(amide-imide)s with N,N′-di(4-methoxyphenyl)-N,N′-diphenyl-p-phenylenediamine units
Source: Royal Society of Chemistry journal article supplement (doi:10.1039/c5ra17520h), 2015-01-01
Supplement: c5ra17520h1.pdf [file c5ra17520h1.pdf]

## Electronic Supplementary Information

### Synthesis and characterization of novel electrochromic poly(amide-imide)s with *N,N'*-di(4-methoxyphenyl)-*N,N'*-diphenyl-*p*-phenylenediamine units

Sheng-Huei Hsiao,<sup>\*a</sup> Chia-Yin Teng,<sup>a</sup> Yu-Ruei Kung,<sup>b</sup>

<sup>a</sup>Department of Chemical Engineering and Biotechnology, National Taipei University of Technology, Taipei 10608, Taiwan. Correspondence to: S.-H. Hsiao (E-mail: [shhsiao@ntut.edu.tw](mailto:shhsiao@ntut.edu.tw))

<sup>b</sup>Div. of Organic Opto-electronic Materials and Applications, Material and Chemical Laboratories, Industrial Technology Research Institute, Hsinchu 31040, Taiwan.

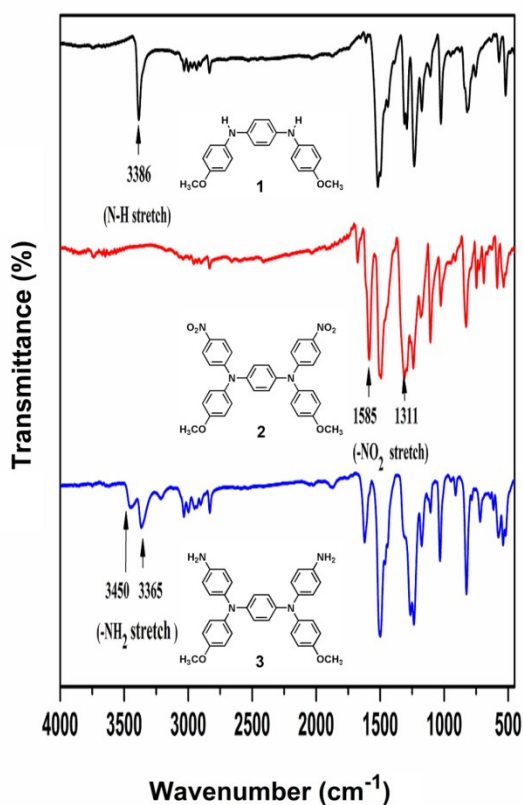

**Fig. S1** IR spectra of synthesized compounds 1–3.

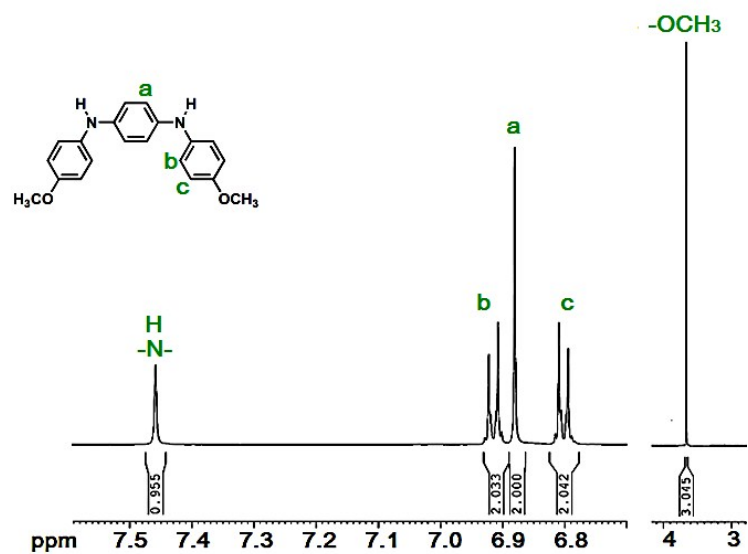

**Fig. S2** The <sup>1</sup>H-NMR spectrum of compound 1 in DMSO-*d*<sub>6</sub>.

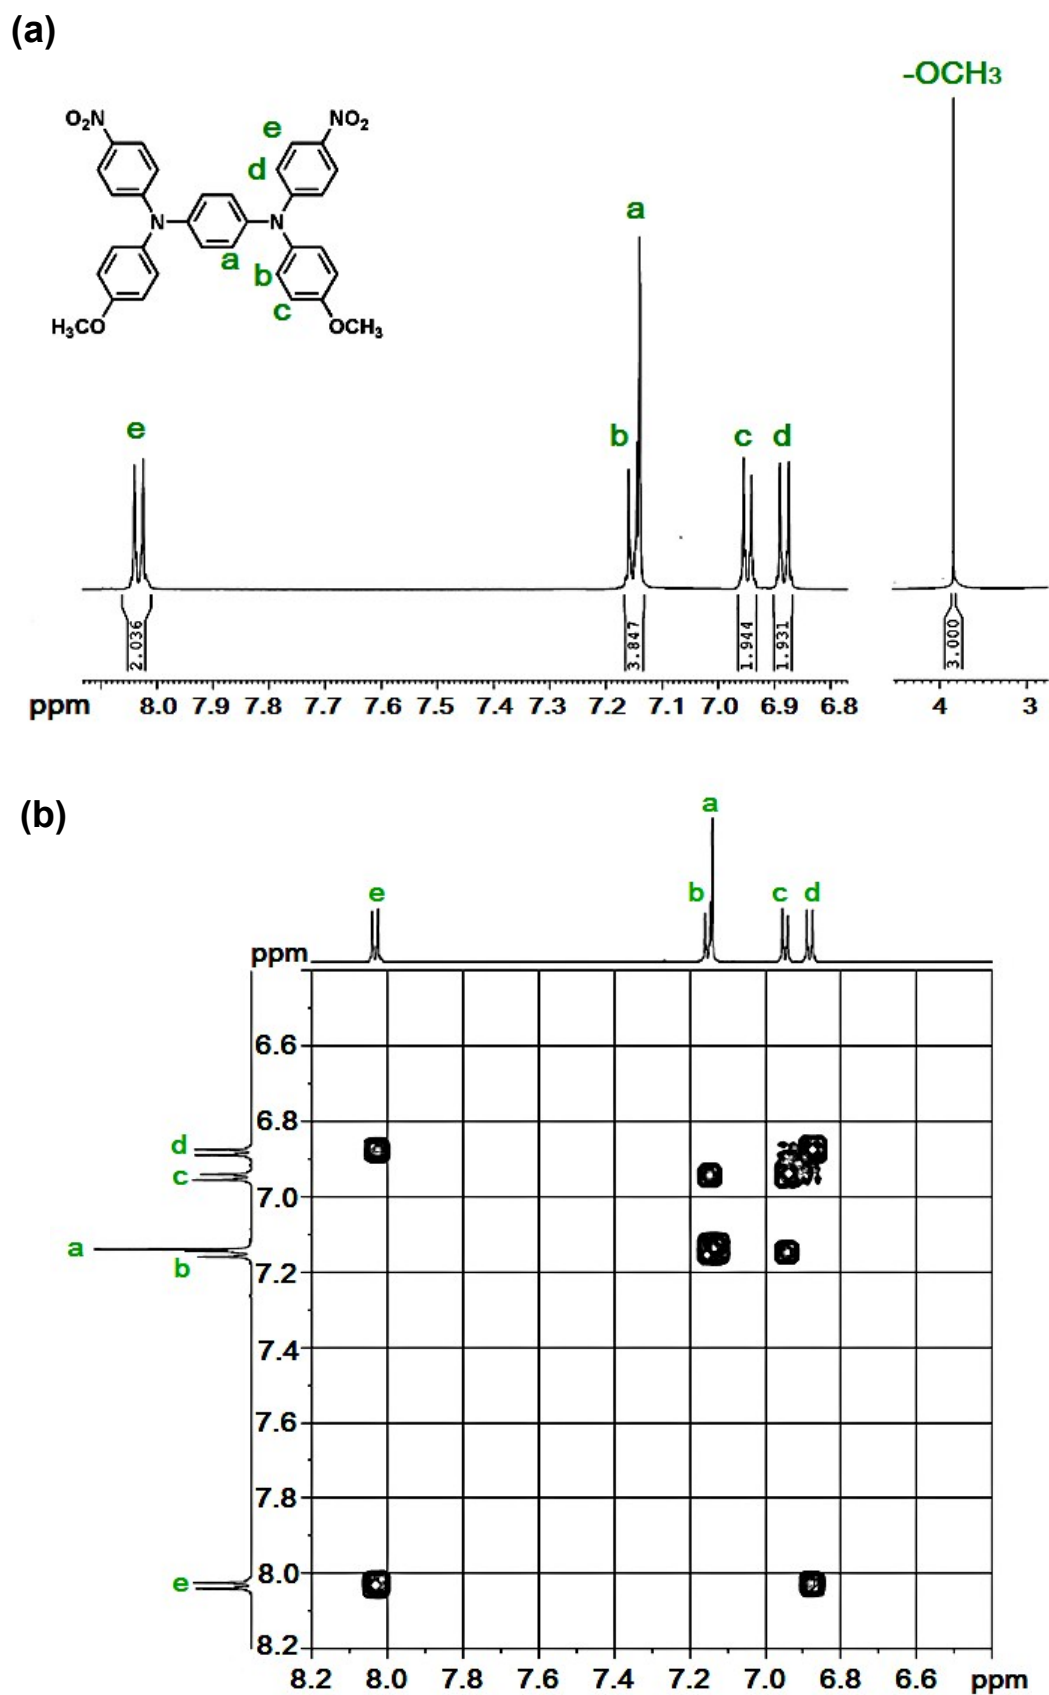

**Fig. S3** (a)  $^1\text{H}$  and (b) H-H COSY NMR spectra of dinitro compound **2** in CDCl<sub>3</sub>.

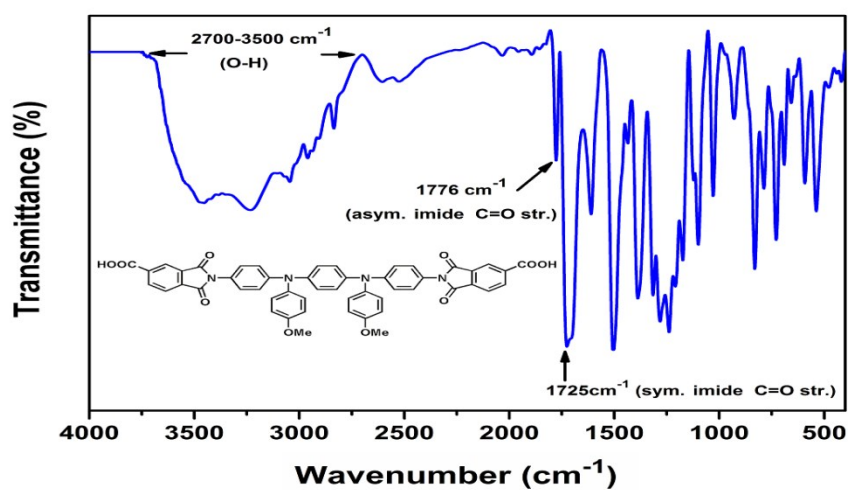

**Fig. S4** The IR spectrum of diimide-diacid monomer 4.

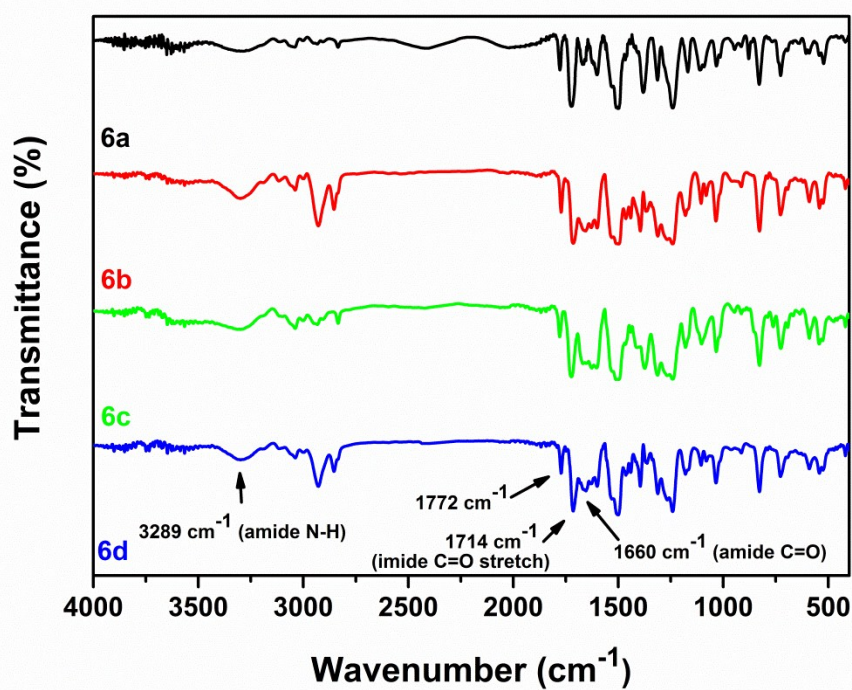

**Fig. S5** IR spectra of PAIs 6a-6d.

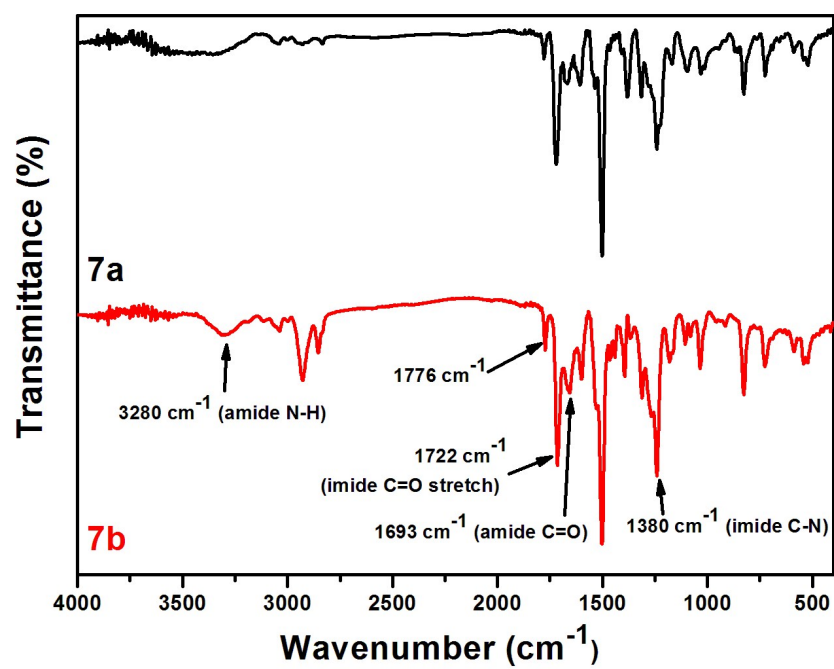

**Fig. S6** IR spectra of PAIs **7a** and **7b**.

(a)

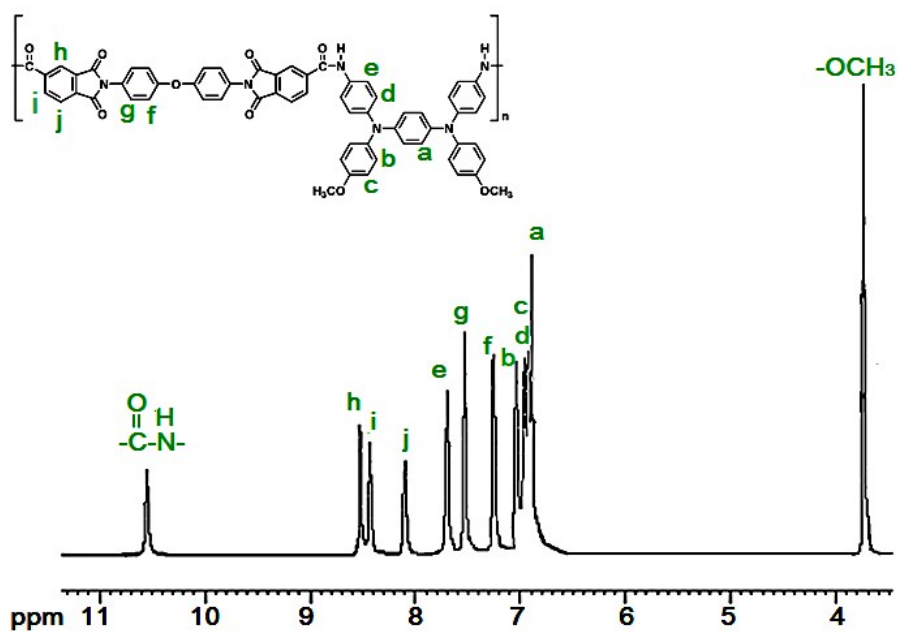

(b)

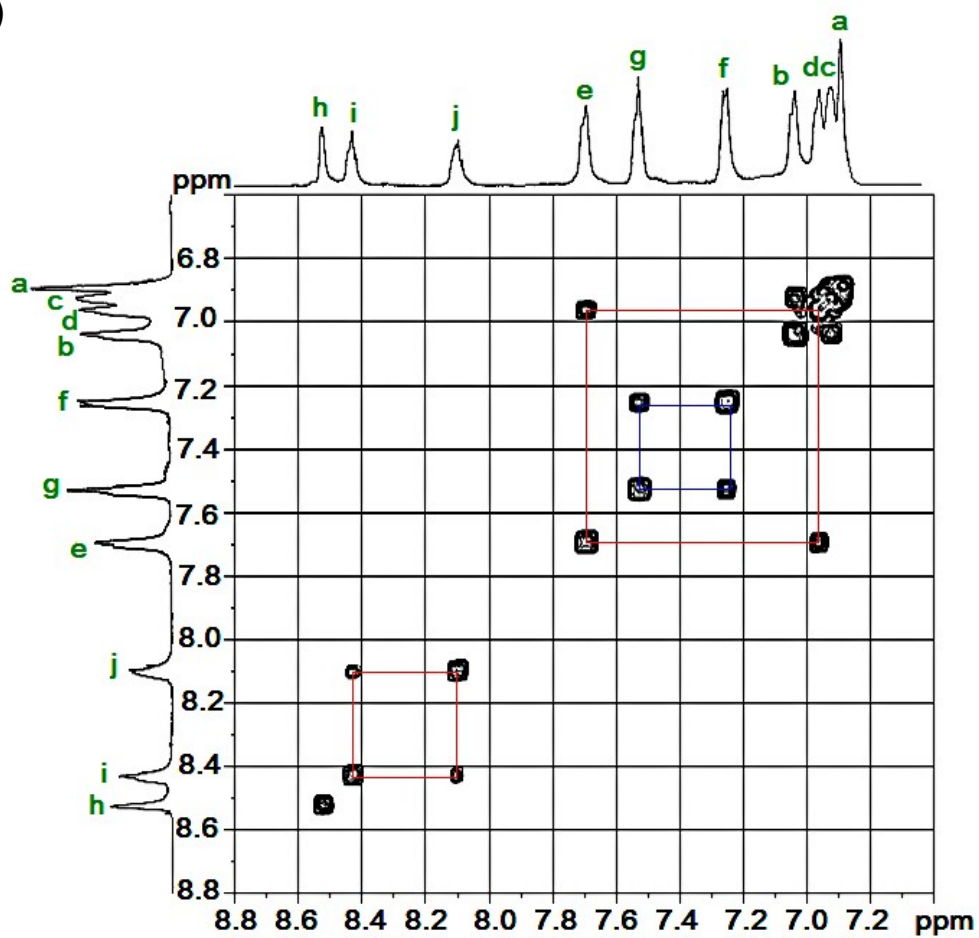

**Fig. S7** (a) <sup>1</sup>H and (b) H-H COSY NMR spectra of PAI **6a** in DMSO-*d*<sub>6</sub>.

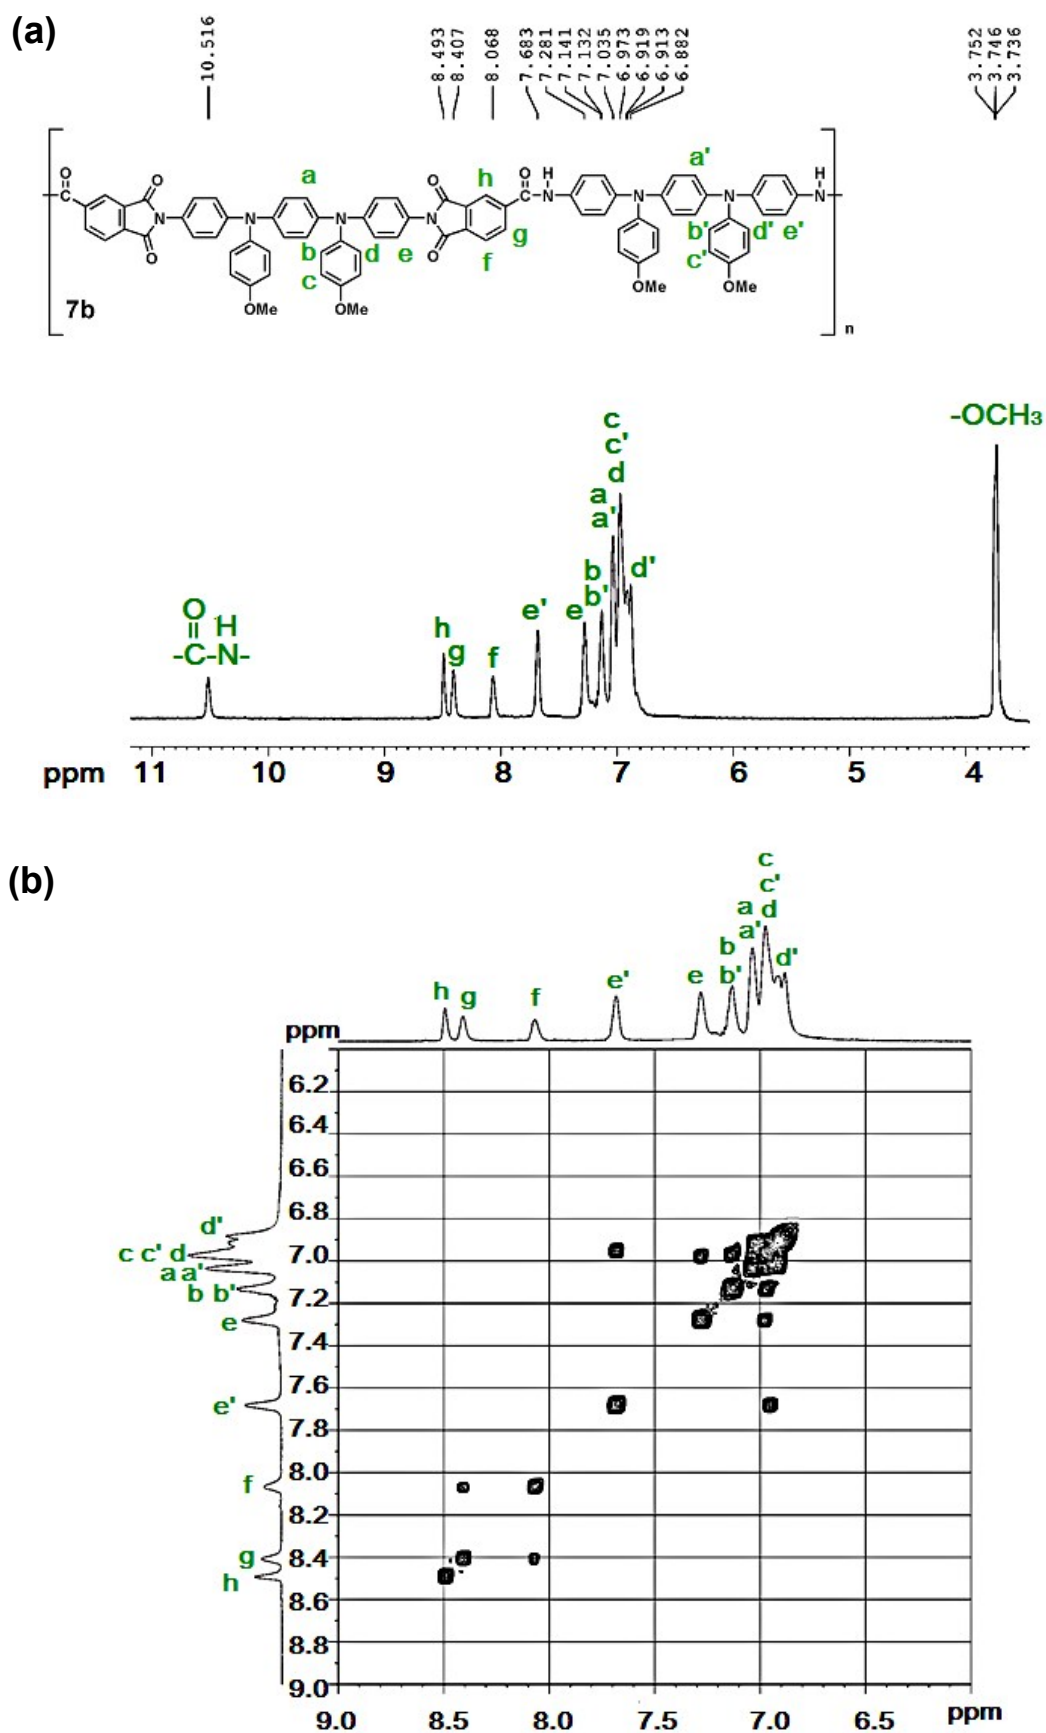

**Fig. S8** (a)  $^1\text{H}$  and (b)  $\text{H}-\text{H}$  COSY NMR spectra of PAI **7b** in  $\text{DMSO}-d_6$ .



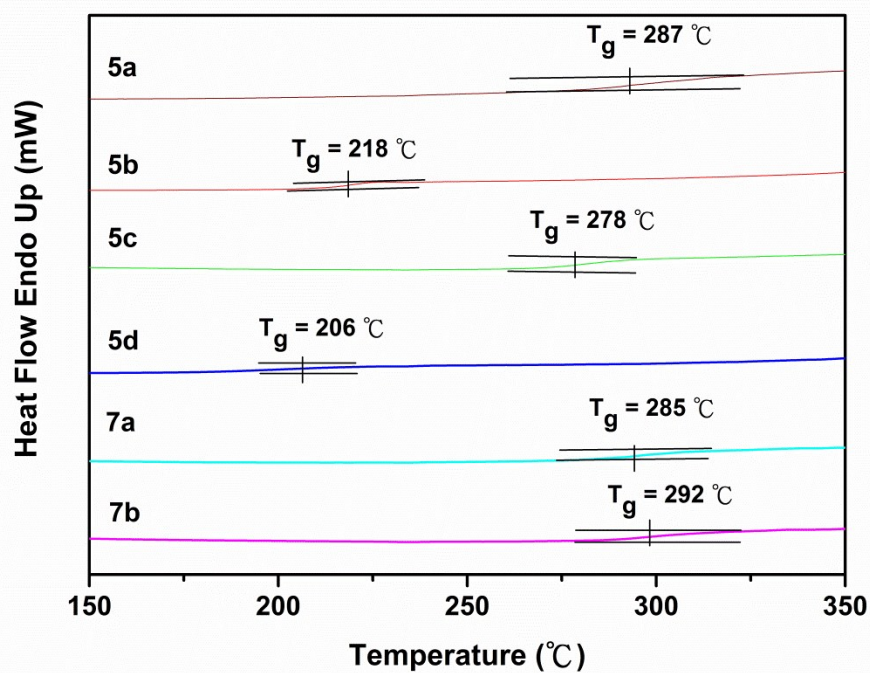

**Fig. S9** DSC curves (the second scans after quenching from 400 °C) of all the PAIs with a heating rate of 20 °C min<sup>-1</sup>.



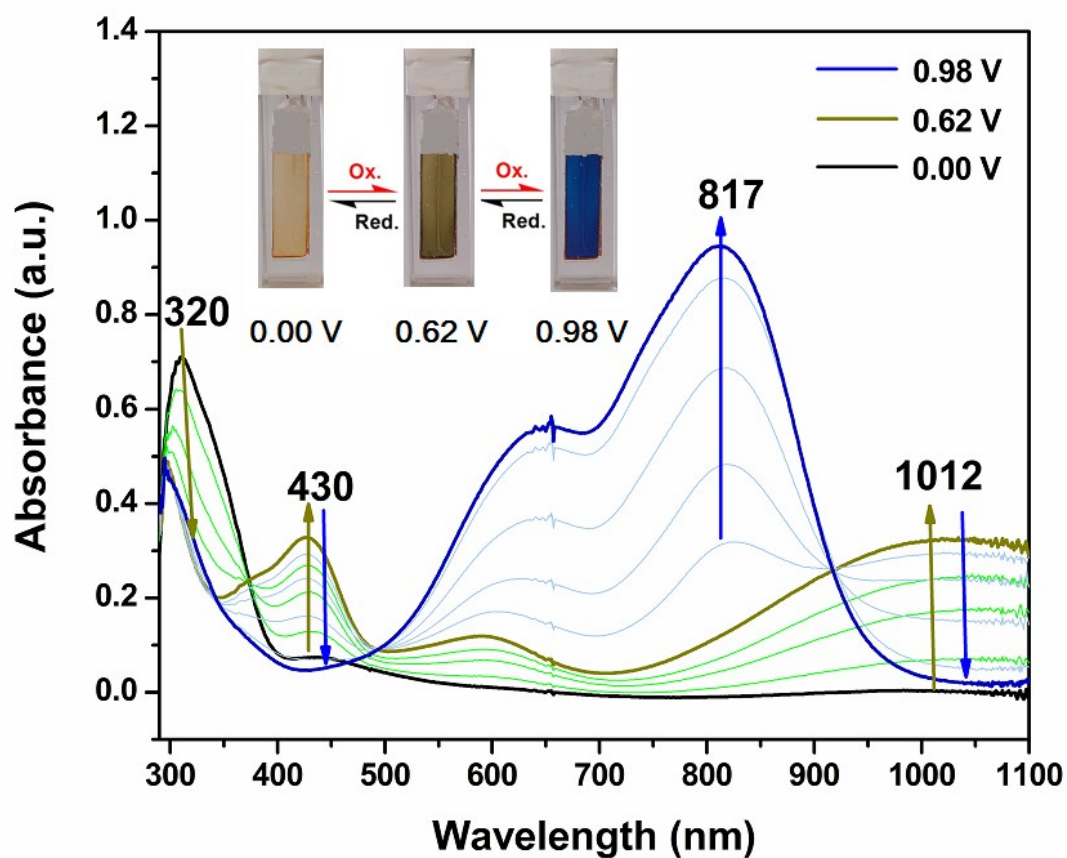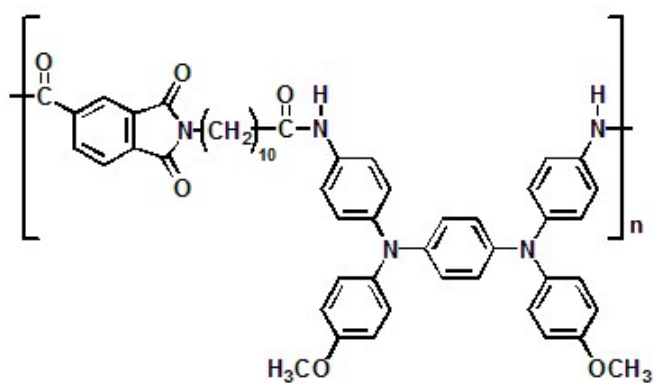

**Fig. S10.** Spectroelectrograms and color changes of **6d** thin film ( $190 \pm 30$  nm in thickness) on the ITO-coated glass substrate in 0.1 M  $\text{Bu}_4\text{NClO}_4/\text{CH}_3\text{CN}$  at applied potentials of 0, 0.35, 0.45, 0.55, 0.65, 0.80, 0.85, 0.90, 0.95, and 0.98 V (vs Ag/AgCl) (Inset: polymer film with about  $1.6 \mu\text{m}$  in thickness).

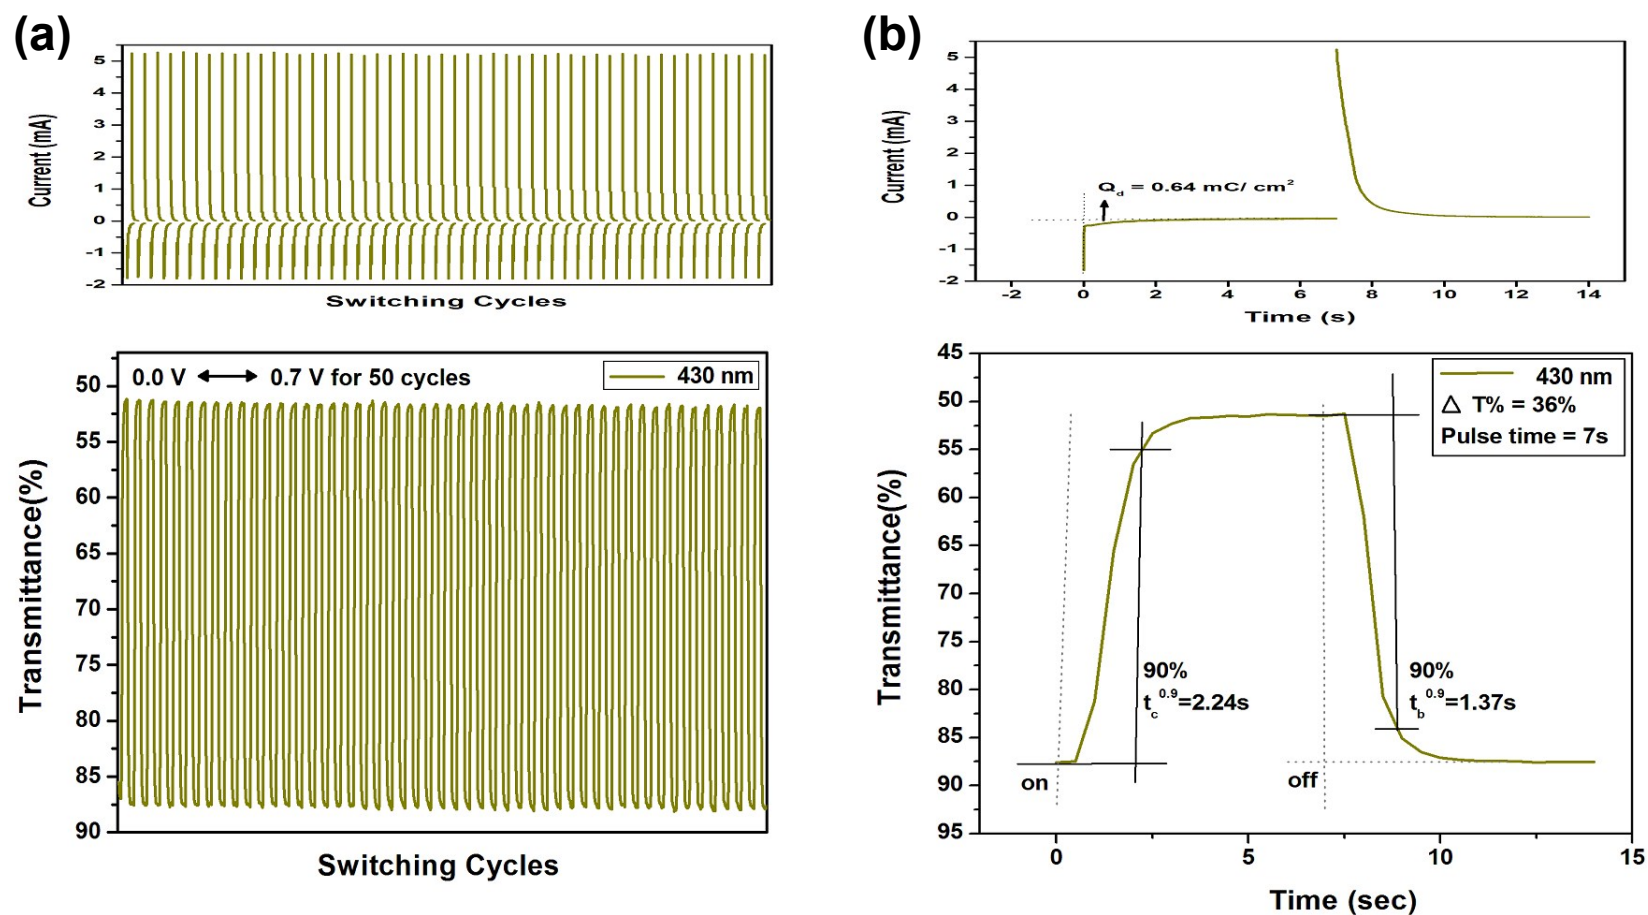

**Fig. S11** Potential step absorptiometry of the cast films of **6d** on the ITO-glass slide (coated area  $\sim 1$  cm<sup>2</sup>) (in CH<sub>3</sub>CN with 0.1 M Bu<sub>4</sub>NClO<sub>4</sub> as the supporting electrolyte) by applying a potential step: (a) optical switching at potential 0.00 V  $\leftrightarrow$  0.70 V (50 cycles) and a switching time of 7 s, monitored at  $\lambda_{\text{max}} = 430$  nm; (b) the 1<sup>st</sup> cycle transmittance change for the **6d** thin film.

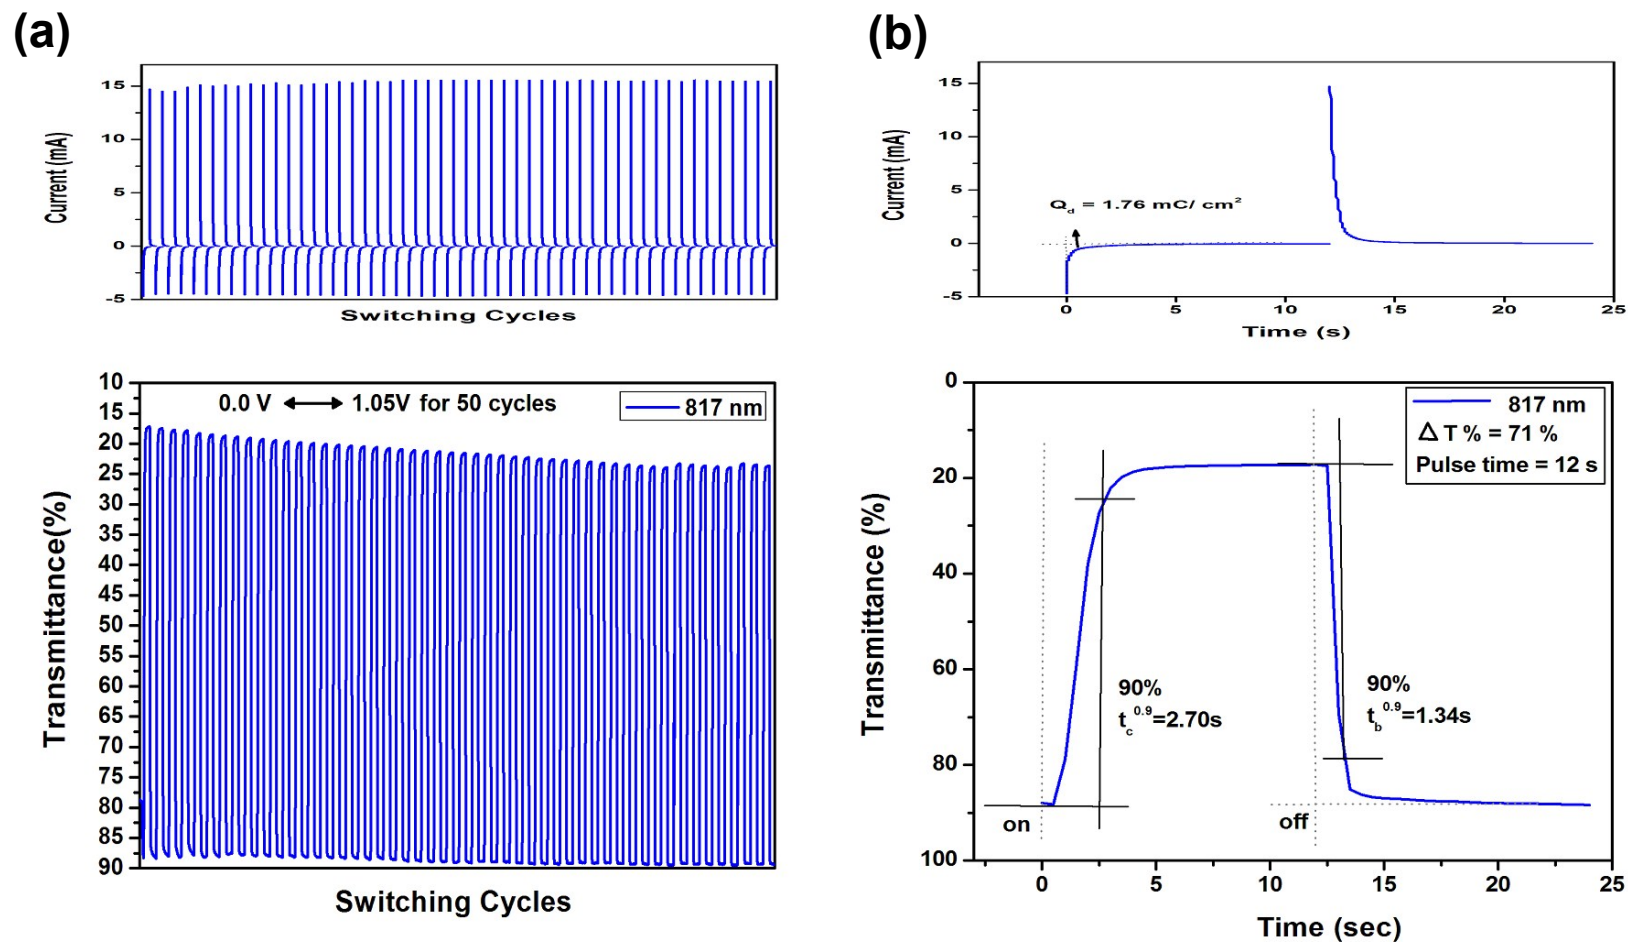

**Fig. S12.** Potential step absorptiometry of the cast films of **6d** on the ITO-glass slide (coated area  $\sim 1 \text{ cm}^2$ ) (in  $\text{CH}_3\text{CN}$  with 0.1 M  $\text{Bu}_4\text{NClO}_4$  as the supporting electrolyte) by applying a potential step: (a) optical switching at potential 0.00 V  $\leftrightarrow$  1.05 V (50 cycles) and a switching time of 12 s, monitored at  $\lambda_{\text{max}} = 817 \text{ nm}$ ; (b) the 1<sup>st</sup> cycle transmittance change for the **6d** thin film.

(a)

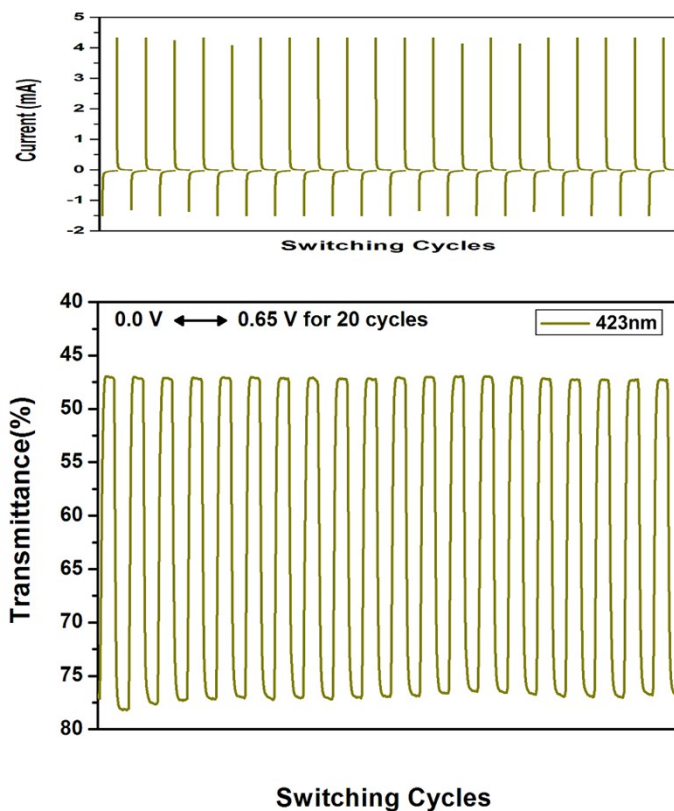

(b)

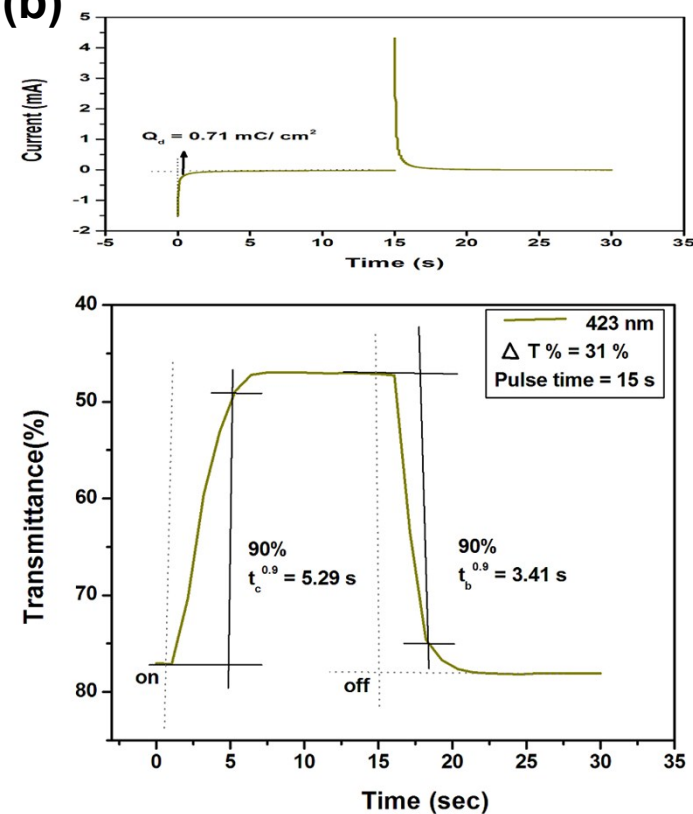

**Fig. S13.** Potential step absorptiometry of the cast film of **7b** on the ITO-glass slide (coated area  $\sim 1 \text{ cm}^2$ ) (in  $\text{CH}_3\text{CN}$  with 0.1 M  $\text{Bu}_4\text{NClO}_4$  as the supporting electrolyte) by applying a potential step: (a) optical switching at potential 0.00 V  $\leftrightarrow$  0.65 V (20 cycles) and a switching time of 15 s, monitored at  $\lambda_{\text{max}} = 423 \text{ nm}$ ; (b) the 1<sup>st</sup> cycle transmittance change for the **7b** thin film.

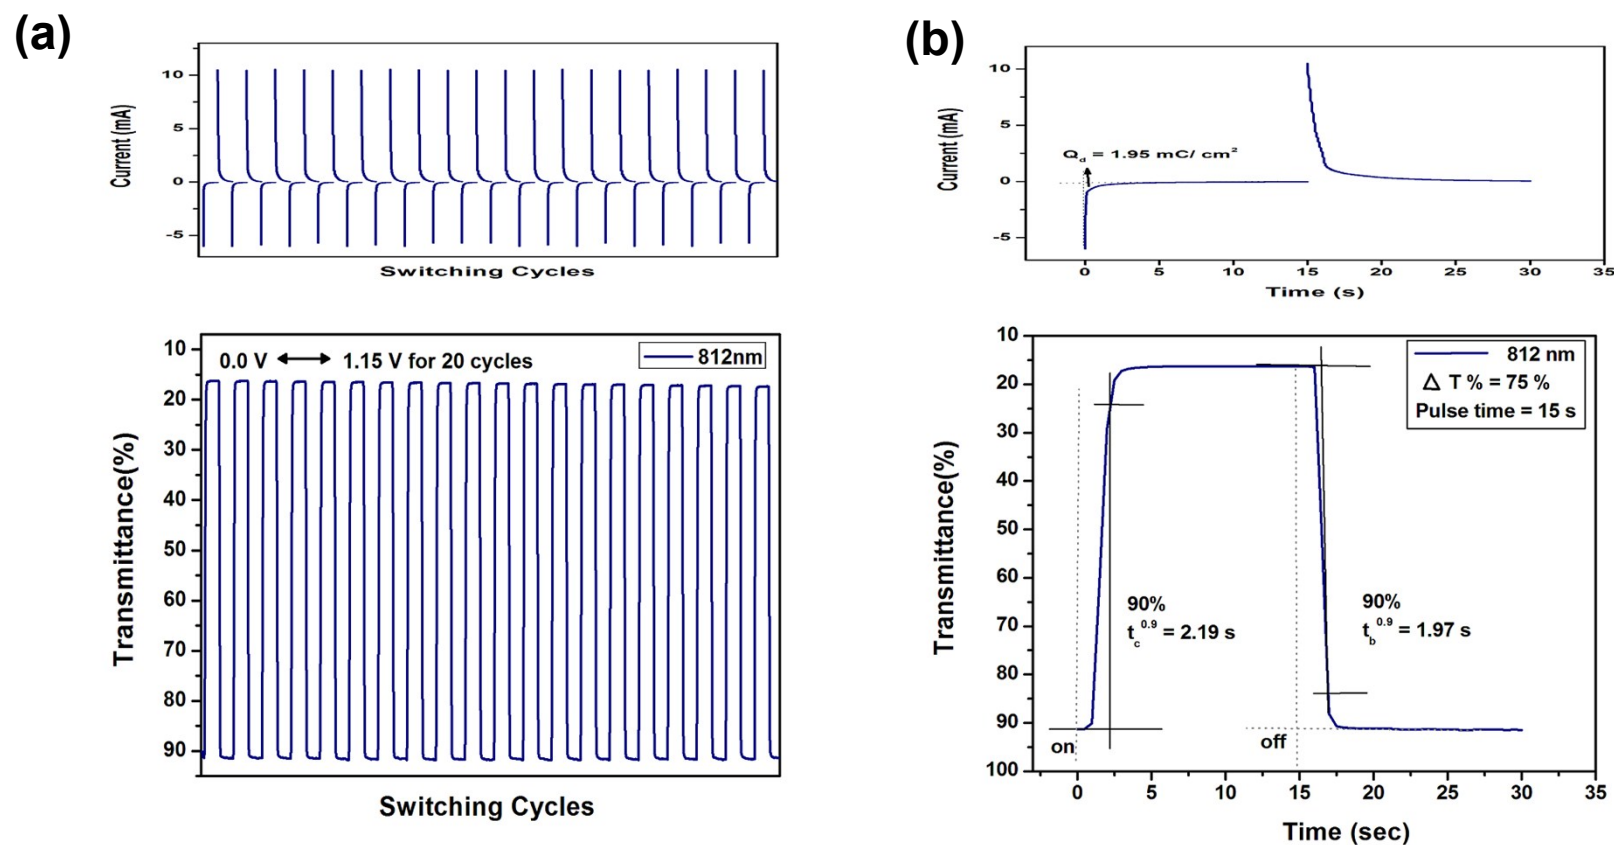

**Fig. S14.** Potential step absorptiometry of the cast film of **7b** on the ITO-glass slide (coated area  $\sim 1 \text{ cm}^2$ ) (in  $\text{CH}_3\text{CN}$  with 0.1 M  $\text{Bu}_4\text{NClO}_4$  as the supporting electrolyte) by applying a potential step: (a) optical switching at potential 0.00 V  $\leftrightarrow$  1.15 V (20 cycles) and a switching time of 15 s, monitored at  $\lambda_{\text{max}} = 812 \text{ nm}$ ; (b) the 1<sup>st</sup> cycle transmittance change for the **7b** thin film.
